# Supplementary material for: A novel alkylsilyl-fused copolymer-based non-fullerene solar cell with over 12% efficiency
Source: Royal Society of Chemistry journal article supplement (doi:10.1039/c8ta12224e), 2019-01-01
Supplement: c8ta12224e1.pdf [file c8ta12224e1.pdf]

## A Novel Alkylsilyl-fused Copolymer-based Non-fullerene Solar Cells with over 12% Efficiency

Guodong Xu <sup>a,b</sup>, Lie Chen<sup>\*a,b</sup>, Hui Lei <sup>a,b</sup>, Zhihui Liao <sup>a,b</sup>, Nan Yi <sup>a,b</sup>, Jinliang Liu <sup>a,b</sup>,  
Yiwang Chen<sup>\*a,b</sup>

<sup>a</sup>College of Chemistry, Nanchang University, 999 Xuefu Avenue, Nanchang 330031, China

<sup>b</sup>Jiangxi Provincial Key Laboratory of New Energy Chemistry/Institute of Polymers, Nanchang University, 999 Xuefu Avenue, Nanchang 330031, China

Corresponding author. Tel.: +86 791 83968703; fax: +86 791 83969561. E-mail: ywchen@ncu.edu.cn (Y. Chen), chenlie@ncu.edu.cn (L. Chen).

### Supporting information

**Materials:** tetrakis(triphenylphosphine)palladium(0)(Pd(PPh<sub>3</sub>)<sub>4</sub>), and other materials were purchase from Alfa or Aldrich, Some solvents were distilled before use (tetrahydrofuran (THF) from sodium), IT-4F were purchased form Derthon. molybdenum oxide (MoO<sub>3</sub>) and Ag (99.998%) were purchased from Nano-C and Rieke Metals, Inc. Indium tin oxide (ITO) was purchased from Delta Technologies Limited.

### Device Fabrication

(1)The inverted device structure was ITO/ZnO/PBDS-TZ:IT-4F/MoO<sub>3</sub>/Ag. A glass substrate with a pre-patterned ITO (sheet resistance=15 Ω sq<sup>-1</sup>) was ultrasonicated in acetone, detergent, deionized water and isopropanol in turn, and then modified by air plasma treatment for 1 min. After spin-coating ZnO with 4000rpm, 1min. and baked on a hot plate at 205 °C for about 60 min. PTZ1-Si:IT-4F was dissolved in chlorobenzene with 0.25% (vol %)1,8-diiodoctane(DIO),(total concentration is 16 mg/mL ) with 1000 rpm for 1 min for active materials. And then with various temperature TA treatment. Then the molybdenum trioxide (7 nm) and argentum cathode (90 nm) was successively thermal evaporation over interface layer under a high vacuum chamber (7×10<sup>-4</sup> Pa) to accomplish the device fabrication.

(2) The conventional device structure was ITO/PEDOT:PSS/PBDS-TZ:IT-4F/PNDIO/Al. A glass substrate with a pre-patterned ITO (sheet resistance =15 Ω sq<sup>-1</sup>)

was first ultrasonicated in acetone, detergent, deionized water and isopropanol in turn, and then modified by air plasma treatment for 3 min. After filtration through a 0.45  $\mu\text{m}$  filter, PEDOT:PSS (Bay PVPAl4083, Bayer AG) was spin-coated at 5000 rpm for 60 s to form a thickness of 30 nm thin layer on the cleaned ITO substrate, and baked on a hot plate at 140  $^{\circ}\text{C}$  for about 20 min. The PBDS-TZ:IT-4F (1:1 w/w) was dissolved in chlorobenzene with 0.25% (vol %) 1,8-diiodooctane (DIO), mixed in solution with total concentration of 16  $\text{mg mL}^{-1}$ , spin-coated onto the interfacial layer at 1000 rpm for 1 min. The PNDIO solution (1  $\text{mg/mL}$ ) was spin-coated on the active layer at 3000 rpm for 60 s, then the aluminium (100 nm) cathode was thermal evaporation over interface layer under a high vacuum chamber ( $7 \times 10^{-4}$  Pa) to accomplish the device fabrication.

The effective device area of one cell was 0.04  $\text{cm}^2$ . The I–V characterization of the devices were measured by a Keithley 2400 Source Meter under simulated solar light (100  $\text{mW/cm}^2$ , AM 1.5 G, Abet Solar Simulator Sun2000). Electron-only devices were fabricated similar to the PSCs with a structure of ITO/ZnO/PBDS-TZ:IT-4F / PDINO/Al. And the hole-only devices fabricated similar to the PSCs with a structure of ITO/PEDOT:PSS/ PBDS-TZ:IT-4F /  $\text{MoO}_3$ /Al. The EQE values measuring system (Oriel Cornerstone 260 1/4 m monochromator equipped with Oriel 70613NS QTH lamp), the monochromatic light from a xenon lamp. A solar simulator was used as the light source, and the light intensity was monitored by using a standard Si solar cell. All characterization processes were conducted in the air.

CV measurements were carried out on a CHI660 potentiostat/galvanostat electrochemical work station at a scan rate of 20  $\text{mVs}^{-1}$ , with a platinum wire as counter electrode and a silver/silver chloride (Ag/AgCl) as reference electrode in a 0.1  $\text{mol L}^{-1}$  solution of tetrabutylammonium perchlorate ( $\text{n-Bu}_4\text{NClO}_4$ ) in anhydrous and nitrogen-saturated acetonitrile ( $\text{CH}_3\text{CN}$ ). A platinum plate coated on a thin film of the studied the two small molecule electrolyte was used as the work electrode. The HOMO and LUMO energy level were calculated by the empirical formula:

$$E_{\text{HOMO}} = [E_{\text{ox}} + 4.8 - E_{\text{Fc/Fc}^+}] \text{ (eV J}^{-1}\text{)}, E_{\text{LUMO}} - E_{\text{HOMO}} = E_{\text{g}}.$$

where  $E_{\text{Fc/Fc}^+}$  is the redox potential of ferrocene/ferrocenium ( $E_{\text{Fc/Fc}^+}$ ) couple in the electrochemical measurement system, and the energy level of  $E_{\text{Fc/Fc}^+}$  was taken as 4.8 eV below vacuum. The  $E_{\text{ox}}$  is the analyte oxidation onset.

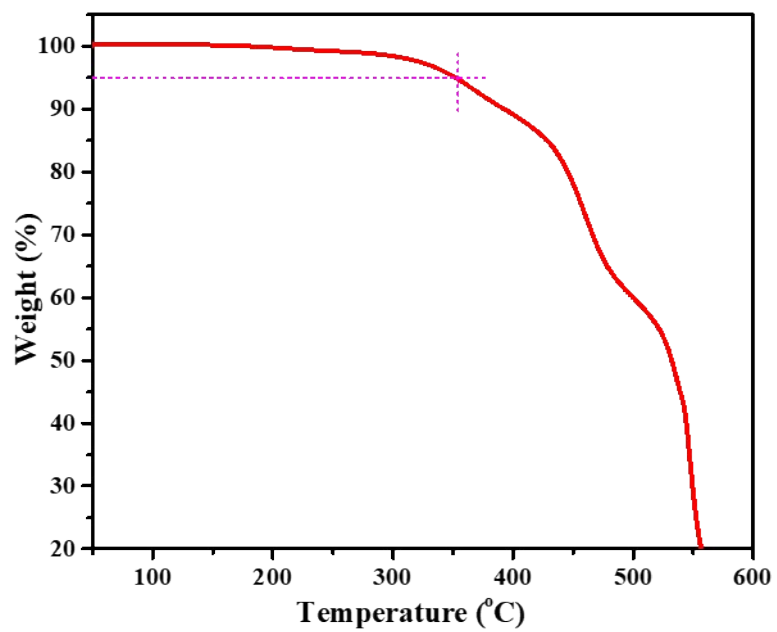

**Figure S1.** Thermogravimetric analysis (TGA) spectra of PBDS-TZ under nitrogen at a heating rate of 10 °C/min.

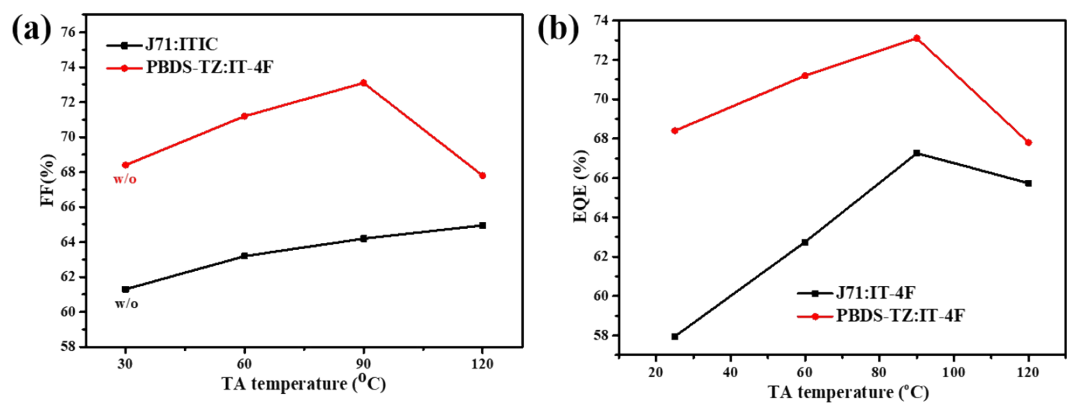

**Figure S2.** (a) The fill factor (FF) of inverted OSCs device based on J71:ITIC and PBDS-TZ:IT-4F with various TA temperature. (b) The fill factor (FF) of inverted OSCs device based on J71:IT-4F and PBDS-TZ:IT-4F with various TA temperature.

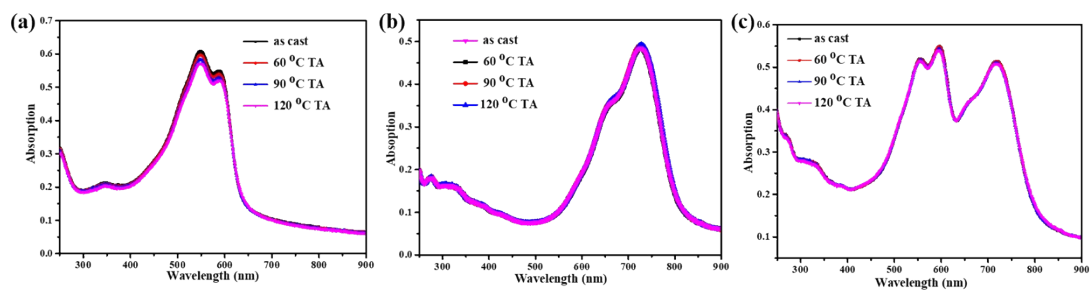

**Figure S3.** Absorption spectra of films with various temperature thermal annealing treatment: (a) PBDS-TZ film. (b) IT-4F film. (c) PBDS-TZ:IT-4F blend film.

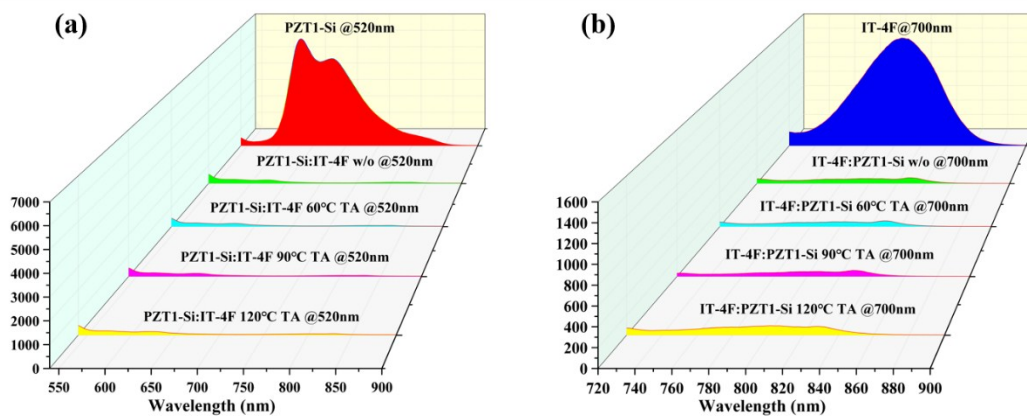

**Figure S4.** Photoluminescence spectra with various temperature of the a) PBDS-TZ:IT-4F blend film (excited at 520 nm); b) PBDS-TZ:IT-4F blend film (excited at 700 nm).

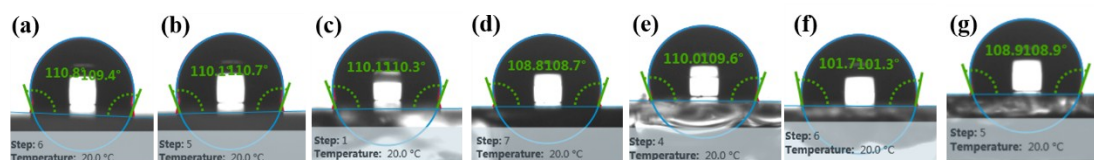

**Figure S6.** Photographs of water droplets on the surface of various film. a) PBDS-TZ film, b) PBDS-TZ:IT-4F blend film without thermal annealing treatment, c) PBDS-TZ :IT-4F blend film with 60 °C thermal annealing treatment.(d) PBDS-TZ :IT-4F blend film with 90 °C thermal annealing treatment. (e) PBDS-TZ:IT-4F blend film with 120 °C thermal annealing treatment.(f) IT-4F film.(g) PZT1-Si :IT-4F blend film without DIO.



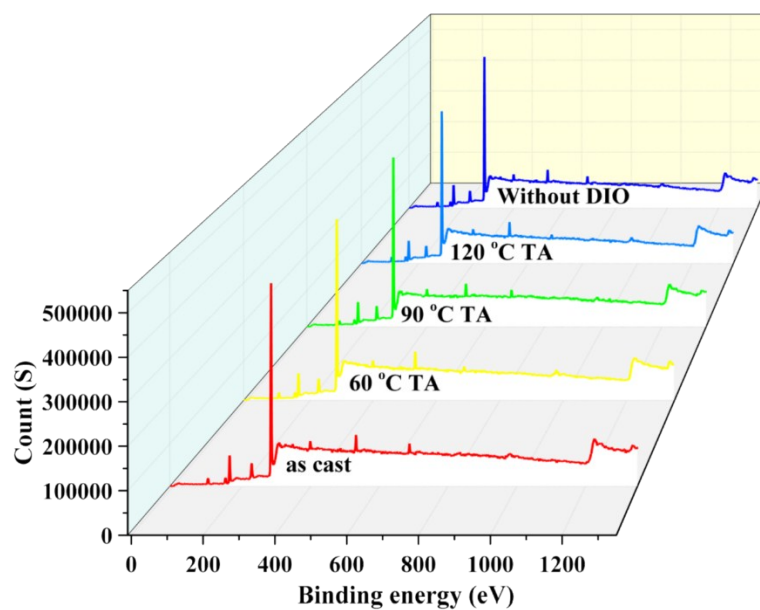

**Figure S7.** X-ray photoelectron spectroscopy (XPS) spectra of surface on blend films.

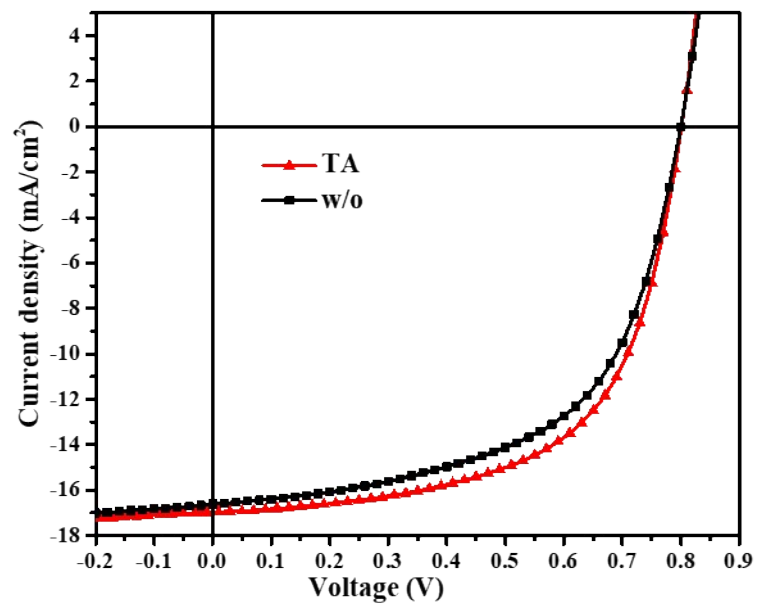

**Figure S8.**  $J$ - $V$  curves of the PSCs devices ITO/PEDOT:PSS/PBDS-TZ:IT-4F/ PDINO/Al without or with 90 °C TA treatment.

**Table S1.** *J-V* curves of the OSCs devices ITO/ZnO/PBDS-TZ:IT-4F/MoO<sub>3</sub>/Ag.

| DIO<br>(%) | TA<br>(°C) | D/A<br>ratio | $V_{oc}$<br>(V) | $J_{sc}$<br>(mA/cm <sup>2</sup> ) | FF<br>(%)  | PCE<br>(%)                                   |
|------------|------------|--------------|-----------------|-----------------------------------|------------|----------------------------------------------|
| —          | —          | 1:1          | 0.800±0.007     | 19.30±0.35                        | 33.80±0.37 | 5.42 <sup>b</sup> (5.20 <sup>a</sup> ±0.25)  |
| 0.5        | —          | 1:1          | 0.787±0.002     | 18.45±0.37                        | 66.70±0.35 | 9.69 <sup>b</sup> (9.57 <sup>a</sup> ±0.23)  |
| 0.5        | 60         | 1:1          | 0.781±0.004     | 19.10±0.42                        | 68.62±0.31 | 10.24 <sup>b</sup> (9.97 <sup>a</sup> ±0.37) |
| 0.5        | 90         | 1:1          | 0.773±0.003     | 20.17±0.46                        | 69.60±0.35 | 10.85 <sup>b</sup> (10.7 <sup>a</sup> ±0.25) |
| 0.5        | 120        | 1:1          | 0.778±0.004     | 19.20±0.32                        | 67.30±0.34 | 10.10 <sup>b</sup> (9.93 <sup>a</sup> ±0.21) |
| 0.25       | 90         | 1.5:1        | 0.734±0.003     | 17.38±0.31                        | 63.48±0.34 | 8.11 <sup>b</sup> (7.89 <sup>a</sup> ±0.27)  |
| 0.25       | 90         | 1:1.5        | 0.764±0.003     | 15.24±0.38                        | 60.91±0.38 | 7.09 <sup>b</sup> (6.97 <sup>a</sup> ±0.25)  |

<sup>a</sup>The averages for photovoltaic parameters of each device are given in parentheses with mean variation obtained from 10 devices, and the ± refer to the standard deviation.

<sup>b</sup>Best device PCE.

**Table S2.** Information of hole and electron mobility of PBDS-TZ:IT-4F.

|          | $\mu_h$ (cm <sup>2</sup> V <sup>-1</sup> s <sup>-1</sup> ) | $\mu_e$ (cm <sup>2</sup> V <sup>-1</sup> s <sup>-1</sup> ) | $\mu_e/\mu_h$ |
|----------|------------------------------------------------------------|------------------------------------------------------------|---------------|
| Without  | $4.53 \times 10^{-4}$                                      | $2.40 \times 10^{-4}$                                      | 1.89          |
| 90 °C TA | $5.01 \times 10^{-4}$                                      | $2.71 \times 10^{-4}$                                      | 1.85          |

**Table S3.** Information of the top surface measured by Contact angle and X-ray photoelectron spectroscopy.

|                        | $\theta_{\text{water}}$ | Surface               | Si   | F    | S    | C     | N    |
|------------------------|-------------------------|-----------------------|------|------|------|-------|------|
|                        | [°]                     | energy $\gamma_s$     | [%]  | [%]  | [%]  | [%]   | [%]  |
|                        |                         | [mJ m <sup>-2</sup> ] |      |      |      |       |      |
| PZTI-Si                | 110.11                  | 17.03                 | —    | —    | —    | —     | —    |
| IT-4F                  | 101.50                  | 19.93                 | —    | —    | —    | —     | —    |
| blend film w/o         | 110.20                  | 16.97                 | 3.66 | 1.26 | 6.84 | 82.10 | 2.73 |
| blend film 60 °C TA    | 109.94                  | 17.70                 | 3.28 | 1.20 | 6.64 | 82.53 | 2.36 |
| blend film 90 °C TA    | 108.77                  | 17.80                 | 3.31 | 1.24 | 6.67 | 82.67 | 3.14 |
| blend film 120 °C TA   | 109.80                  | 17.21                 | 3.19 | 0.94 | 6.26 | 83.9  | 2.62 |
| blend film without DIO | 108.90                  | 17.75                 | 3.16 | 1.25 | 6.80 | 82.20 | 2.77 |

**Table S4.** The atomic content of blend films with various etch times.

|            | Etch time | Si    | S    | C     | N    | O    | F    |
|------------|-----------|-------|------|-------|------|------|------|
|            | (s)       | (%)   | (%)  | (%)   | (%)  | (%)  | (%)  |
| Without TA | 0         | 3.66  | 6.84 | 82.10 | 2.73 | 3.40 | 1.26 |
|            | 100       | 2.86  | 4.95 | 87.21 | 1.65 | 1.54 | 1.76 |
|            | 200       | 2.77  | 4.82 | 87.30 | 1.63 | 1.68 | 1.77 |
|            | 300       | 2.79  | 4.90 | 87.15 | 1.72 | 1.66 | 1.76 |
|            | 400       | 2.77  | 4.98 | 87.09 | 1.65 | 1.81 | 1.70 |
| TA         | 0         | 3.31  | 6.67 | 82.27 | 3.14 | 3.38 | 1.24 |
|            | 100       | 2.284 | 4.90 | 86.84 | 1.70 | 2.57 | 1.71 |
|            | 200       | 2.68  | 4.89 | 85.60 | 1.94 | 3.18 | 1.70 |
|            | 300       | 2.72  | 4.99 | 85.29 | 1.89 | 3.39 | 1.71 |
|            | 400       | 2.66  | 5.08 | 84.64 | 2.41 | 3.38 | 1.83 |

**Table S5.**  $J$ - $V$  curves of the PSCs devices ITO/PEDOT:PSS/PBDS-TZ:IT-4F/ PDINO/Al without or with 90 °C TA treatment.

|          | $V_{oc}$ (V) | $J_{sc}$ (mA/cm <sup>2</sup> ) | FF (%)    | PCE (%)                                     |
|----------|--------------|--------------------------------|-----------|---------------------------------------------|
| Without  | 0.802±0.003  | 16.8±0.35                      | 59.0±0.43 | 8.00 <sup>b</sup> (7.83 <sup>a</sup> ±0.25) |
| 90 °C TA | 0.800±0.005  | 17.1±0.42                      | 60.5±0.47 | 8.34 <sup>b</sup> (8.07 <sup>a</sup> ±0.32) |

<sup>a</sup>The averages for photovoltaic parameters of each device are given in parentheses with mean variation obtained from 10 devices, and the ± refer to the standard deviation.

<sup>b</sup>Best device PCE.

**Table S6.** *J-V* curves of the PSCs devices ITO/ZnO/J71:IT-4F /MoO<sub>3</sub>/Ag without or with TA treatment.

| TA treatment | $V_{oc}$ [V] | $J_{sc}$ [mA cm <sup>-2</sup> ] | FF [%]     | PCE [%]                                     |
|--------------|--------------|---------------------------------|------------|---------------------------------------------|
| w/o          | 0.764±0.003  | 18.69±0.35                      | 56.98±0.45 | 8.23 <sup>b</sup> (8.09 <sup>a</sup> ±0.15) |
| 60 °C        | 0.759±0.003  | 18.78±0.36                      | 62.74±0.35 | 9.06 <sup>b</sup> (8.78 <sup>a</sup> ±0.23) |
| 90 °C        | 0.756±0.003  | 18.24±0.33                      | 67.26±0.37 | 9.38 <sup>b</sup> (9.18 <sup>a</sup> ±0.22) |
| 120 °C       | 0.734±0.003  | 17.86±0.37                      | 65.74±0.42 | 8.73 <sup>b</sup> (8.57 <sup>a</sup> ±0.17) |

<sup>a</sup>The averages for photovoltaic parameters of each device are given in parentheses with mean variation obtained from 10 devices, and the ± refer to the standard deviation.

<sup>b</sup>Best device PCE.
